# Supplementary material for: Homotypic cell cannibalism, a cell-death process regulated by the nuclear protein 1, opposes to metastasis in pancreatic cancer
Source: PubMed Central journal article supplement (PMC3491828; doi:10.1002/emmm.201201255), 2012-07-23
Supplement: emmm0004-0964-SD2.pdf [file emmm0004-0964-SD2.pdf]

## **Supporting information**

### **Homotypic cell cannibalism, a cell-death process regulated by the Nuclear Protein 1, opposes to metastasis in pancreatic cancer**

Carla E Cano<sup>1-4</sup>, María José Sandí<sup>1-4</sup>, Tewfik Hamidi<sup>1-4</sup>, Ezequiel L Calvo<sup>5</sup>, Olivier Turrini<sup>2</sup>, Laurent Bartholin<sup>6-9</sup>, Céline Loncle<sup>1-4</sup>, Véronique Secq<sup>1-4</sup>, Stéphane Garcia<sup>1-4</sup>, Gwen Lomberk<sup>10</sup>, Guido Kroemer<sup>11-15</sup>, Raul Urrutia<sup>10</sup>, Juan L Iovanna<sup>1-4§</sup>.

<sup>1</sup>Inserm U1068, CRCM, Cell Stress, Marseille, F-13009, France; <sup>2</sup>Institut Paoli-Calmettes, Marseille, F-13009, France; <sup>3</sup>Aix-Marseille University, F-13284, Marseille, France; <sup>4</sup>CNRS, UMR7258, CRCM, Marseille, F-13009, France; <sup>5</sup>Molecular Endocrinology and Oncology Research Center, CHUL Research Center, Quebec, Canada; <sup>6</sup>INSERM U1052, Lyon, F-69008, France; <sup>7</sup>CNRS UMR 5286, Lyon, F-69008, France; <sup>8</sup>Centre de Recherche en Cancérologie de Lyon, Centre Léon Bérard, Lyon, F-69008, France; <sup>9</sup>University of Lyon, Lyon, F-69003, France; <sup>10</sup>Laboratory of Epigenetics and Chromatin Dynamics, Gastroenterology Research Unit, Departments of Biochemistry and Molecular Biology, Biophysics, and Medicine, Mayo Clinic, Rochester, USA; <sup>11</sup>INSERM, U848, Villejuif, France; <sup>12</sup>Metabolomics Platform, Institut Gustave Roussy, Villejuif, France; <sup>13</sup>Centre de Recherche des Cordeliers, Paris, France; <sup>14</sup>Pôle de Biologie, Hôpital Européen Georges Pompidou, AP-HP, Paris, France; <sup>15</sup>Université Paris Descartes, Paris 5, Paris, France.

## **Table of content**

### **Supplementary Figure legends**

**Supplementary Figure 1.**

**Supplementary Figure 2.**

**Supplementary Figure 3.**

**Supplementary Figure 4.**

**Supplementary Figure 5.**

**Supplementary Figure 6.**

**Supplementary Figure 7.**

**Supplementary Figure 8.**

**Supplementary Figure 9.**

**Supplementary Figure 10.**

**Supplementary Table 1.**

**Supplementary Table 2.**

**Supplementary Table 3.**

**Supplementary Table 3.**

**Supplementary Table 4.**

## **Supplementary Figure legends:**

### **Supplementary Figure 1: Cannibal cells in PDAC lack expression of Nupr1.**

Immunohistological staining of Nupr1 in human PDAC samples. a. Whole picture of the crop shown in Figure 1f. b, c and d. Several examples of cannibal cells observed in PDAC patients. e. Low magnification picture of a human PDAC sample displaying strong Nupr1 staining in epithelial cancer cells.

### **Supplementary Figure 2: HoCC in human PDAC cell lines.**

Dot plots illustrate a representative experiment that yielded the results depicted in figure 5d, showing FACS measurements HoCC in PDAC cell lines that were stained with CFSE or CMPTX dyes (Capan-1, Capan-2, PATU8988T, PATU8902, Panc-1, Panc-1-pCCL and Panc-1-pCCLNupr1), or stably transduced with fluorescent pCCL-GFP or pLVX-DsRed vectors, prior to mixing and incubation for 48 h at 37°C. For cells transiently stained with dyes, cannibal gates were designed based in dot blots from cells mixed just before FACS acquisition (0 h).

### **Supplementary Figure 3: Gemcitabine increases HoCC and inhibits Nupr1 expression in Panc-1 cells.**

a. EGFP- and DsRed-Panc-1 cells were mixed at equal numbers and cultured in the presence or absence of gemcitabine (GEM, 50  $\mu$ M) for 48 h, then, % of cannibal cells was assessed by FACS. b. qRT-PCR assessment of Nupr1 expression in Panc-1 cells with or without GEM treatment for 24 h. Cyclophilin A mRNA expression was assessed as housekeeping control. Data are means of triplicates  $\pm$  SEM.

### **Supplementary Figure 4: Effect of nutrient deprivation and inhibition of molecular actors of autophagy and entosis on HoCC.**

EGFP- and DsRed-Panc-1 cells were mixed at equal numbers, transfected with the indicated siRNAs, and cultured in nutrient-free EBSS medium or conventional medium without (Mock) or with TGF $\beta$  (10 ng/ml). Dot plots illustrate a representative experiment of the results depicted in Figure 5e.

### **Supplementary Figure 5: Nupr1-knockdown enhances HoCC.**

Nupr1-expression was knocked-down using two additional siRNAs that were reported previously (Giroux et al. 2006) (a). In b and c, histogram and dot plots of a representative experiment showing that additional Nupr1-specific siRNAs led to reproduction of results obtained using siNupr1. Data are means of triplicates  $\pm$  SEM. \*  $p \leq 0.05$  compared to siCtrl.

### **Supplementary Figure 6: Nupr1-depletion does not affect xeno-cannibalism in PDAC cells.**

Panc-1 cells were transfected with siCtrl or siNupr1 48 h prior to mixing with CFSE-stained PBMC, and cultured with or without TGF $\beta$  for 6 h at the temperatures indicated. (left)

histograms show overlap of CFSE+ cell counts in the conditions indicated. (right) Bars show mean percentage of CFSE+ cells in each condition. Data are means of triplicates  $\pm$  SEM.

**Supplementary Figure 7: Nupr1-knockdown allows upregulation of phagocytosis-related genes in Panc-1 cells.** a. qRT-PCR confirming enhanced or ectopic expression of phagocytosis-related genes in Nupr1-depleted cells compared to control cells, after 24 h of TGF $\beta$ 1 treatment. Cyclophilin A mRNA expression was used as housekeeping control. Data are means of triplicates  $\pm$  SEM. \*  $p \leq 0.05$ , \$  $p \leq 0.01$ , £  $p \leq 0.005$ , &  $p \leq 0.001$ . b. Heatmap showing altered expression of TGF $\beta$ -induced EMT-related genes in Panc-1 cells after Nupr1-knockdown (siNupr1) compared to controls (siCtrl).

**Supplementary Figure 8: FACS-based quantification of the impact of inactivation of phagocytosis related genes on HoCC.** Figure shows representative dot plots of experiments that yielded the results exposed in Figure 6b, demonstrating the impact of inactivation of: a) CCR1 expression, CXCL1 and CXCL6 activity (by the use of neutralizing antibodies); b) CCR1-mediated signal using the repertaxin (RTX) antagonist; c) CSF1 and IL-11 expressions; d) cdc42 expression.

**Supplementary Figure 9: p38MAPK activity, but not Smad4, is necessary for HoCC in Nupr1-deficient PDAC cells.** Dot plots of a representative experiment that yielded the results depicted in Figure 6e and f. a. EGFP- and DsRed-BxPC3 (Smad-4-mutated) cells were transfected with siCtrl or siNupr1 and treated with or without TGF $\beta$  for 48 h; b. EGFP- and DsRed-Panc-1 cells were transfected with siCtrl or siNupr1 and treated with or without TGF $\beta$ , and with or without the p38MAPK-inhibitor SB203580 for 48 h.

**Supplementary Figure 10: Nupr1-deficiency enables cell cannibalism and death in murine pancreatic tumors.** Low magnification confocal microscopy pictures of cleaved caspase-3 (red), cytokeratin-19 (KRT19, green) and the phagocyte marker F4/80 (blue) immunofluorescent staining on histological sections of *Nupr1*<sup>WT</sup> and *Nupr1*<sup>KO</sup> *Pdx1-creER*; *LSL-Kras*<sup>G12D</sup>; *Ink4A*<sup>fl/fl</sup> pancreatic tumors. The white box delimitates the region amplified in Figure 7b.

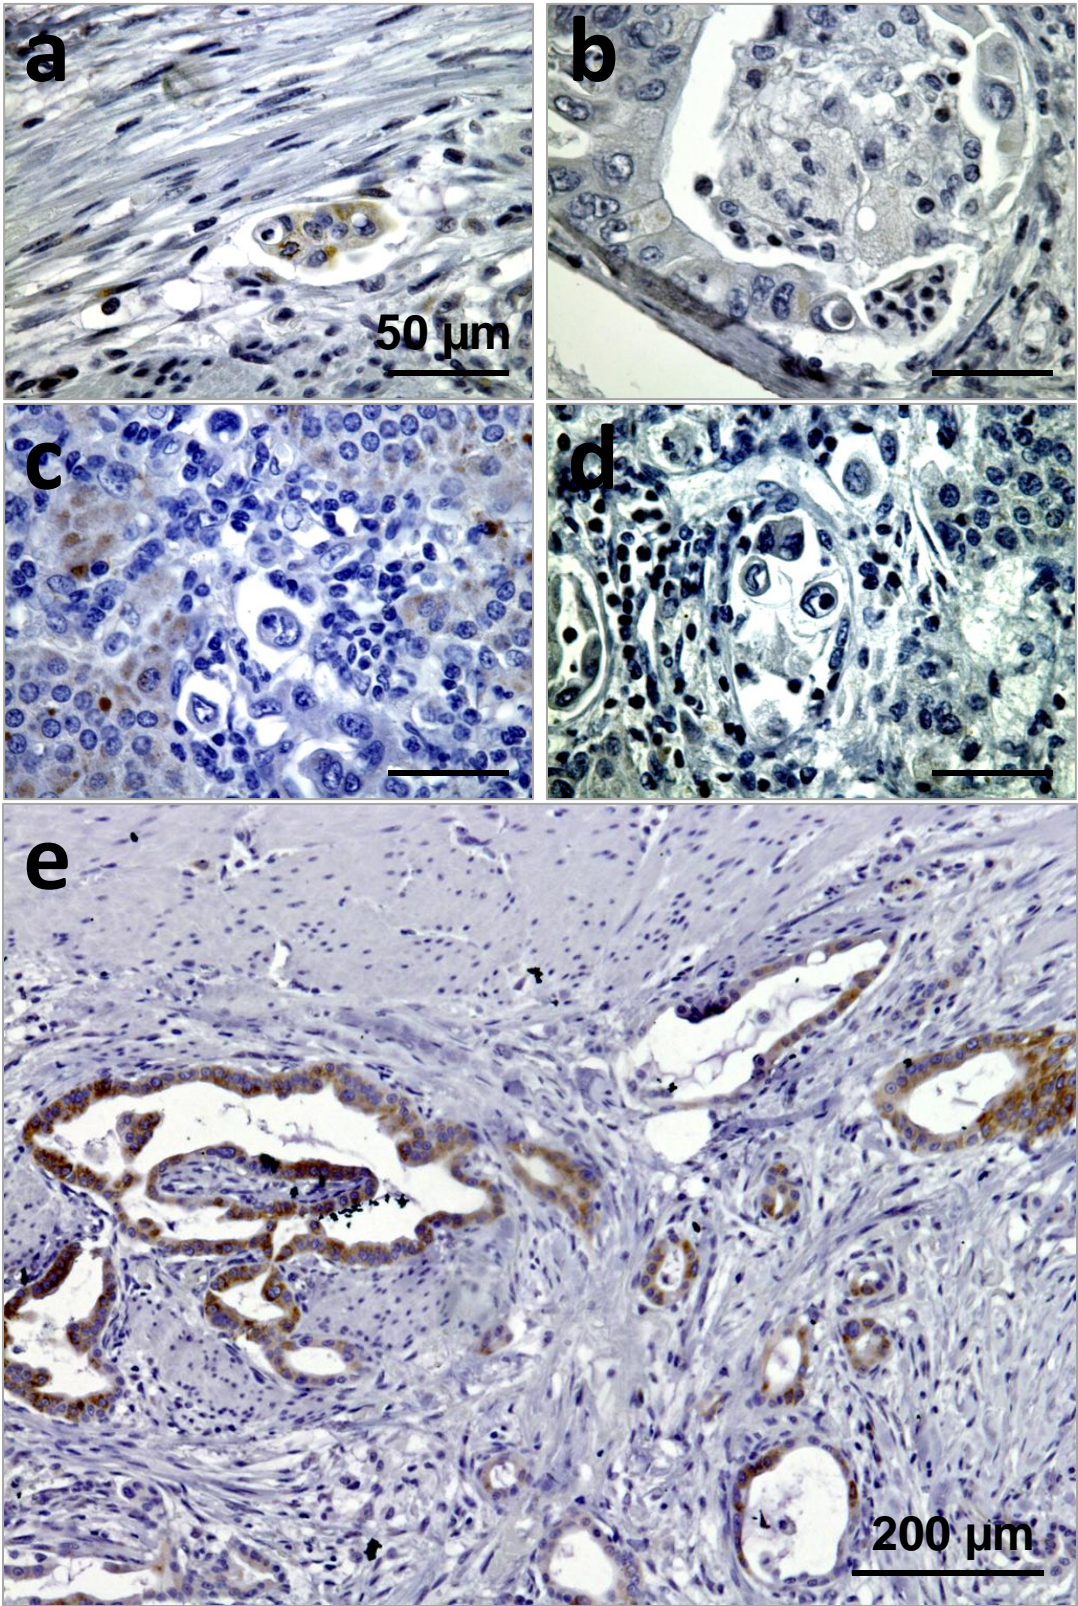

Supplementary Figure 1

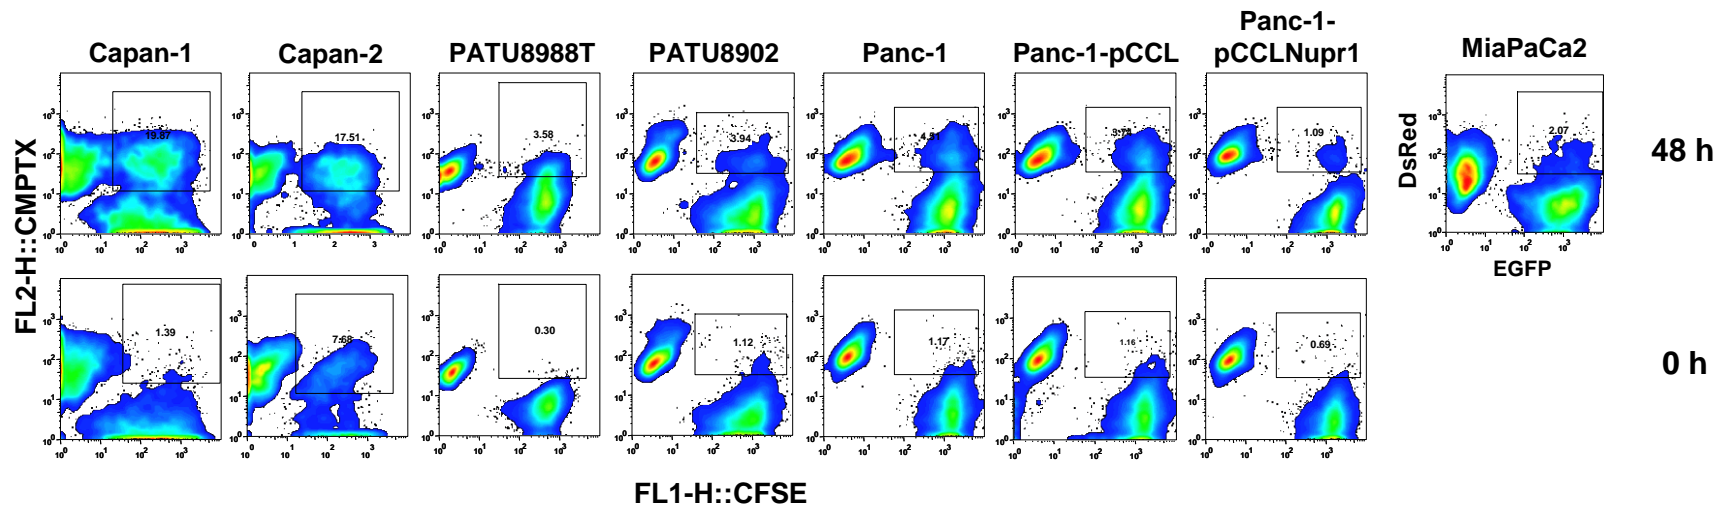

Supplementary Figure 2

**a**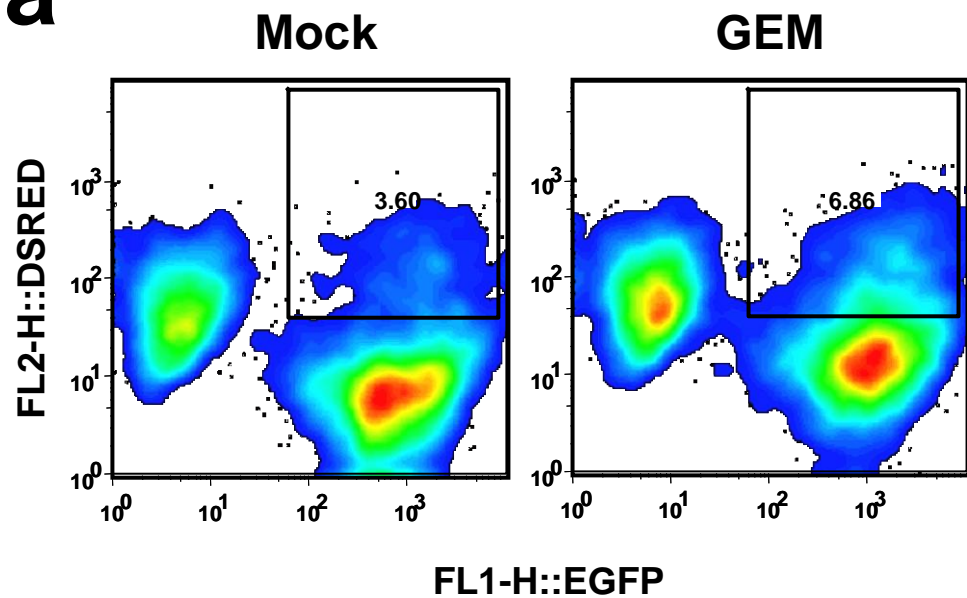**b**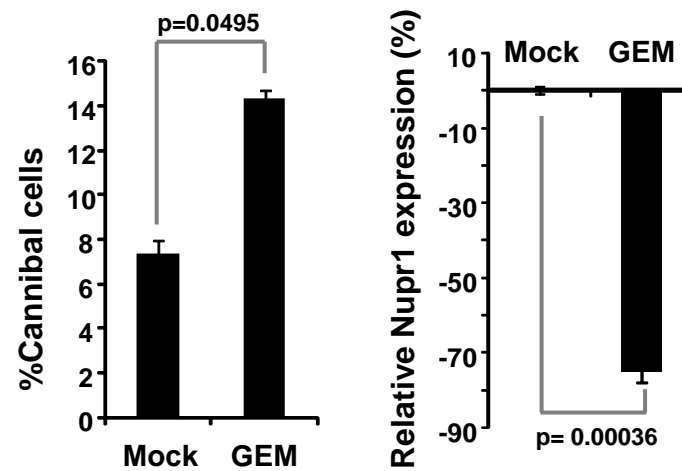**Supplementary Figure 3**

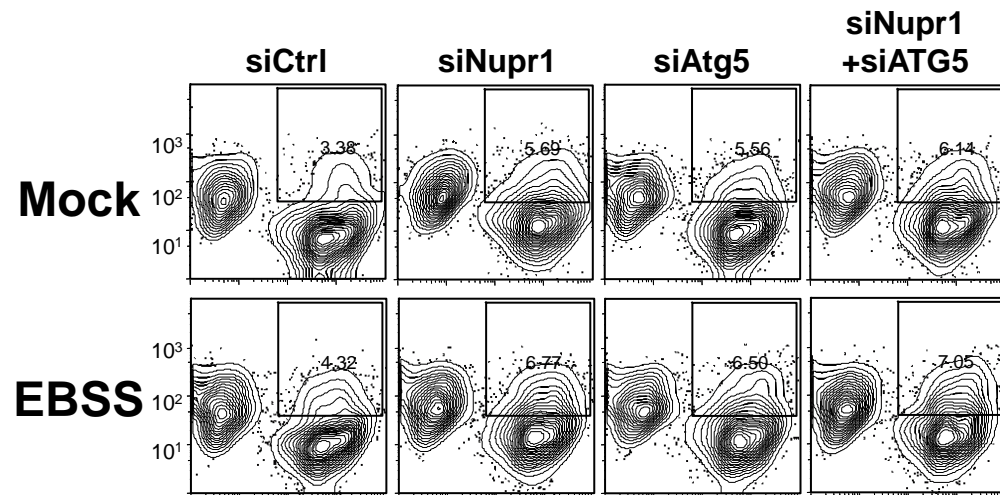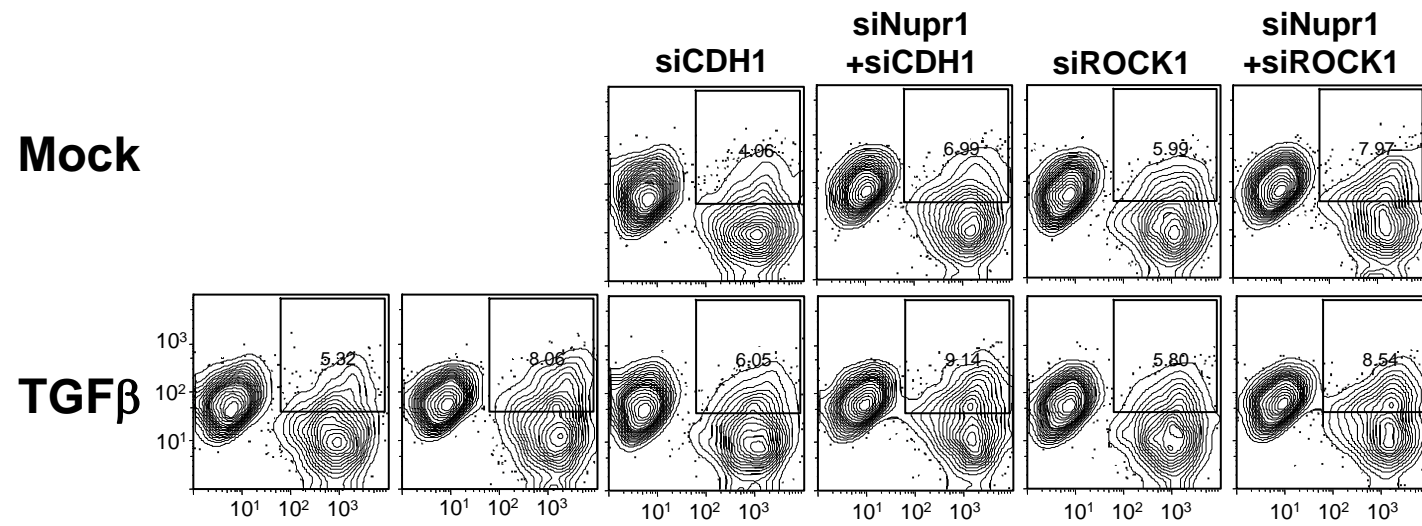

Supplementary Figure 4

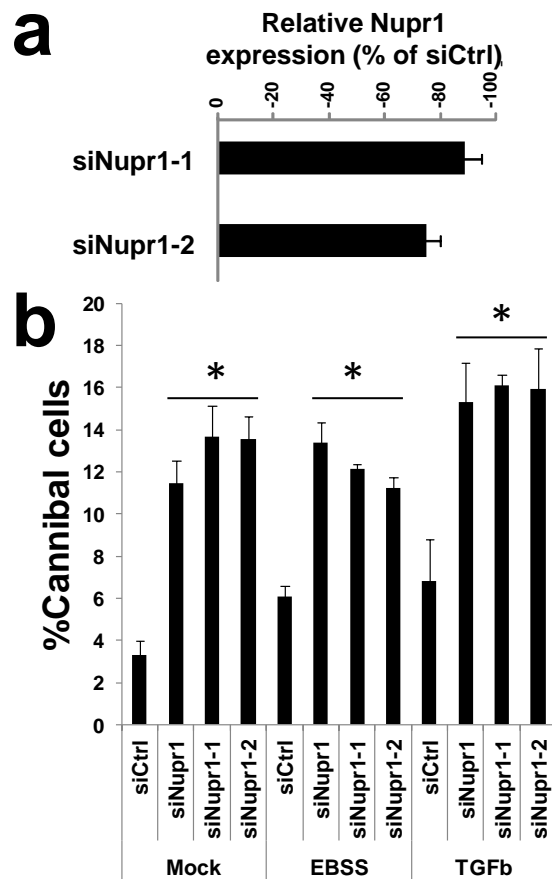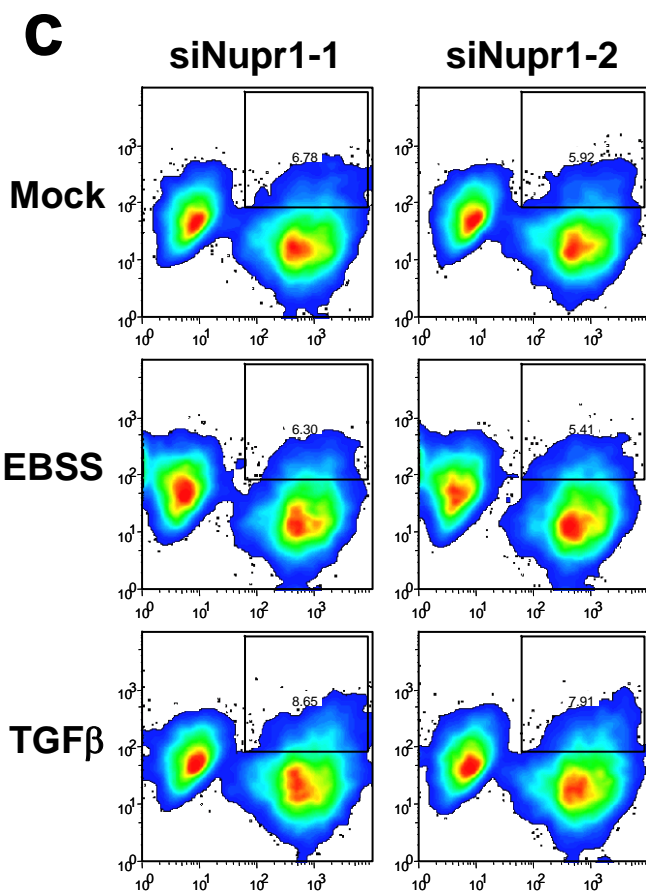

Supplementary Figure 5



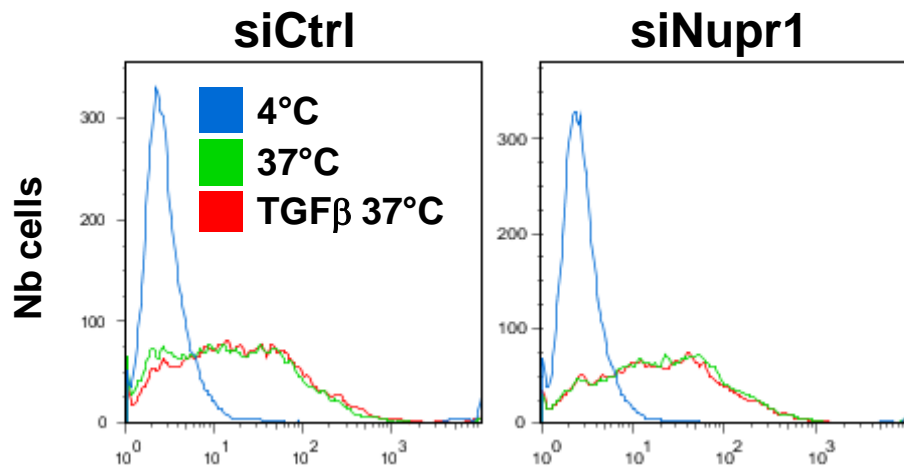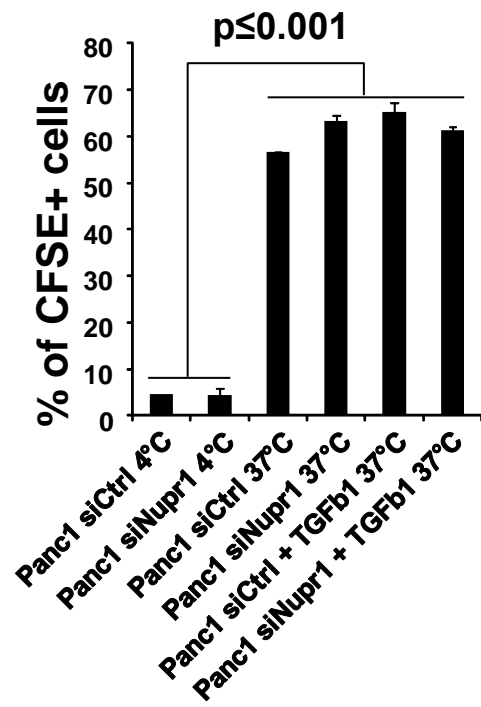

Supplementary Figure 6

**a**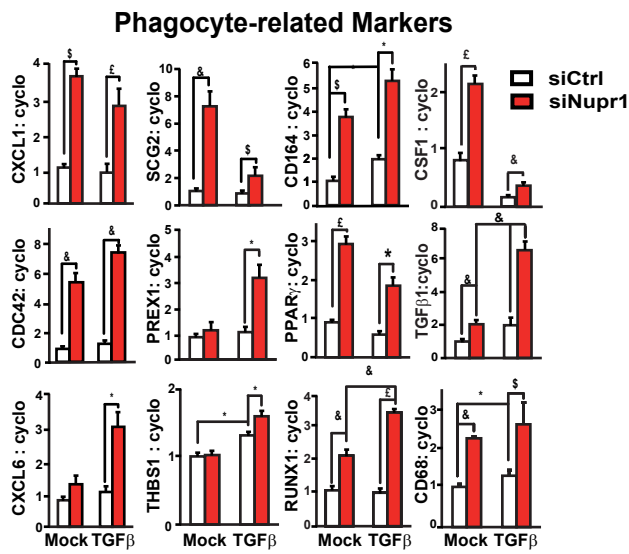**b**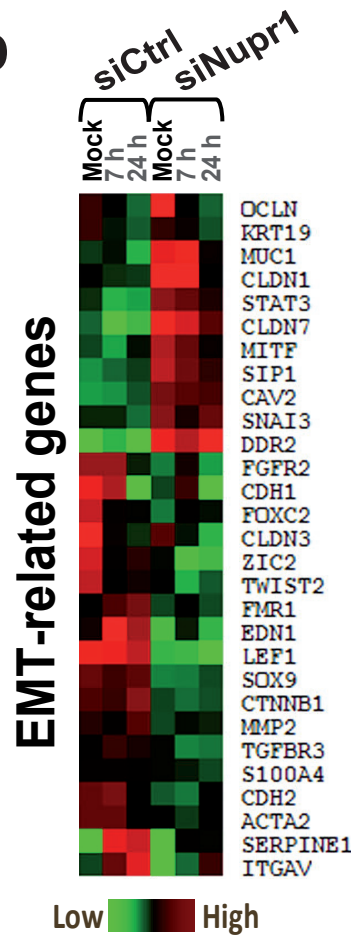

Supplementary Figure 7

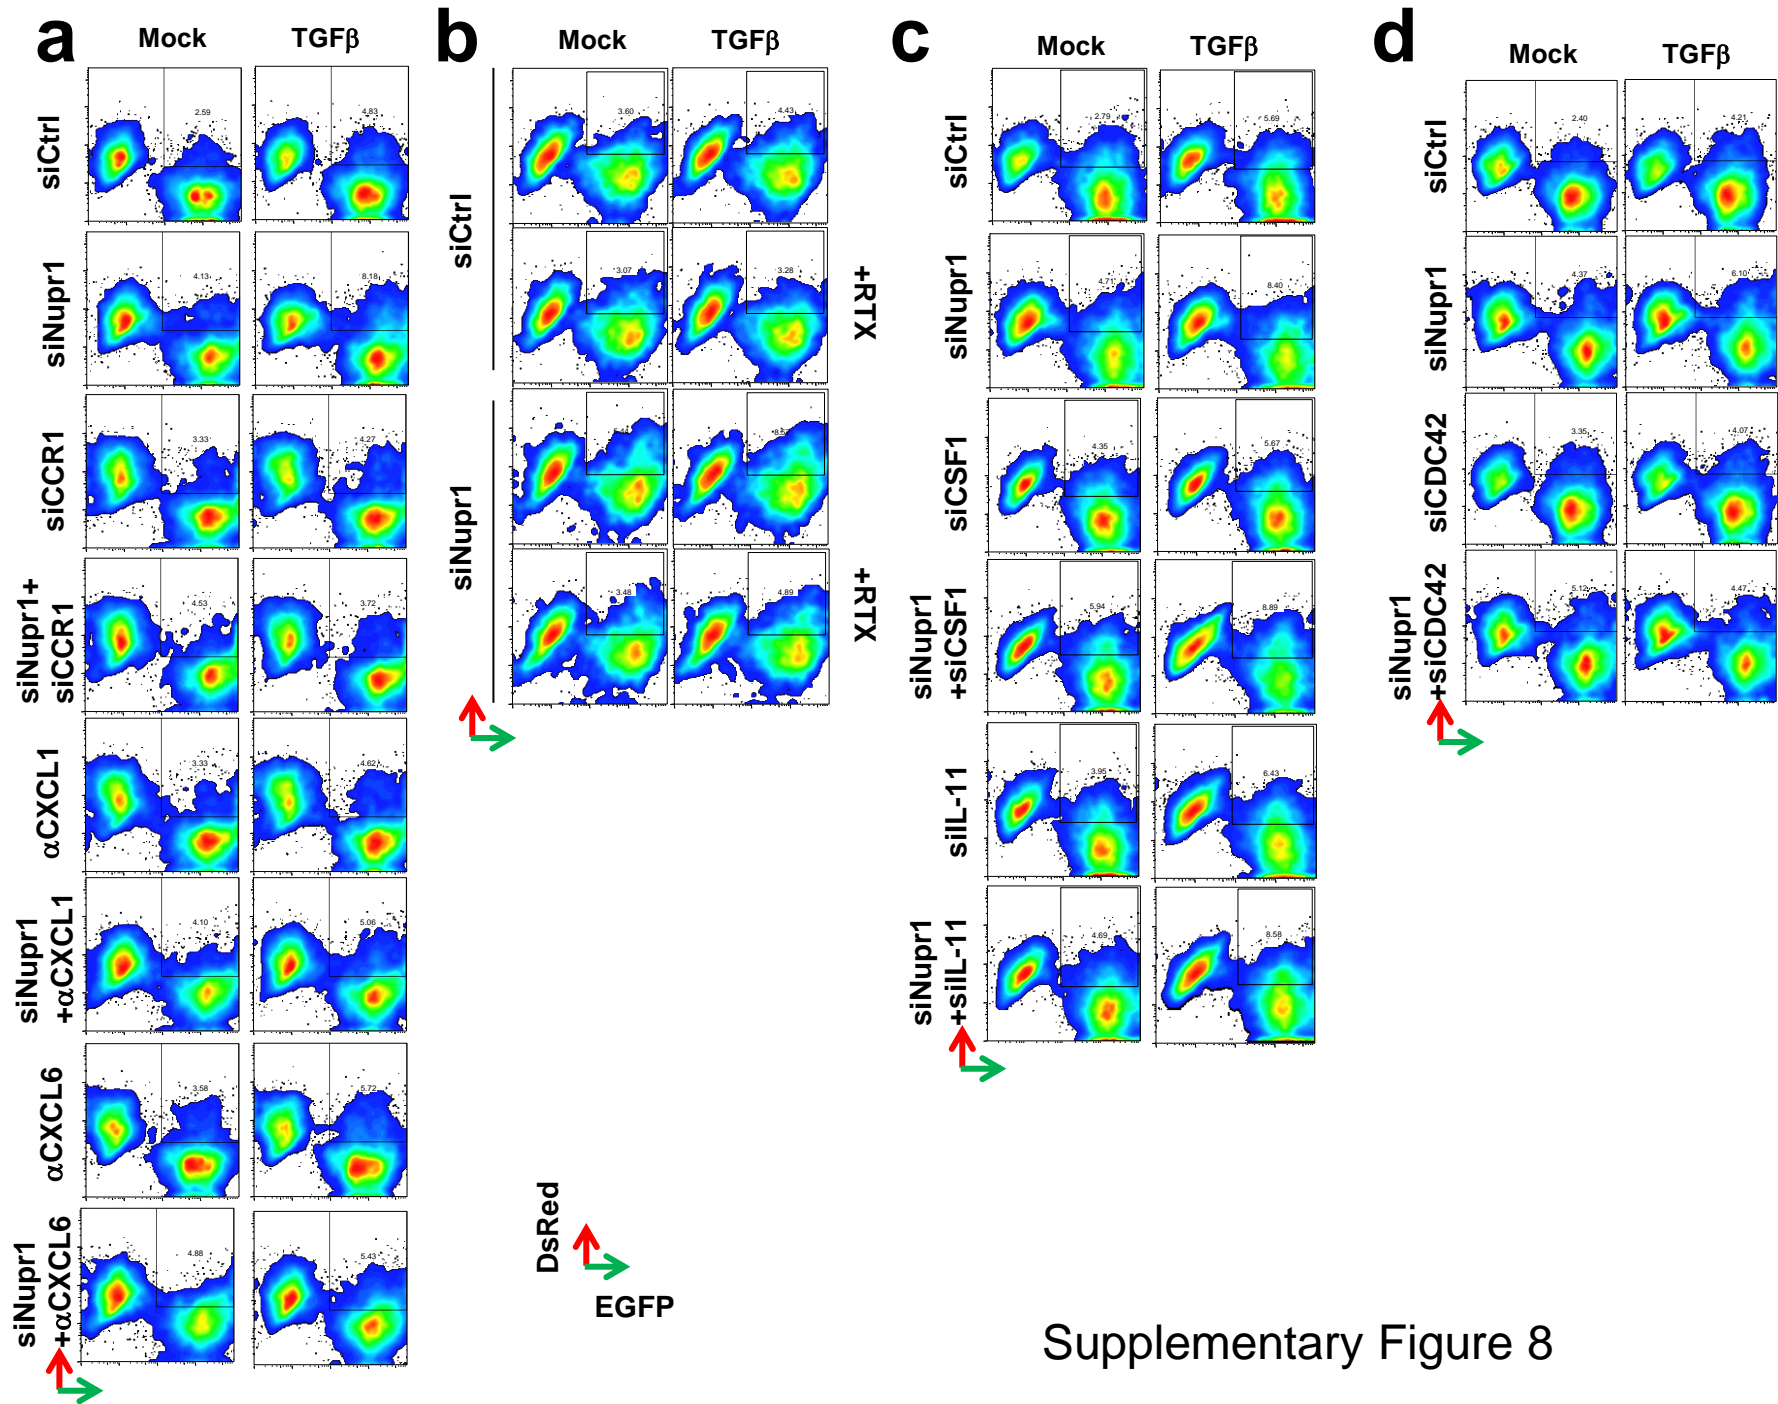

Supplementary Figure 8

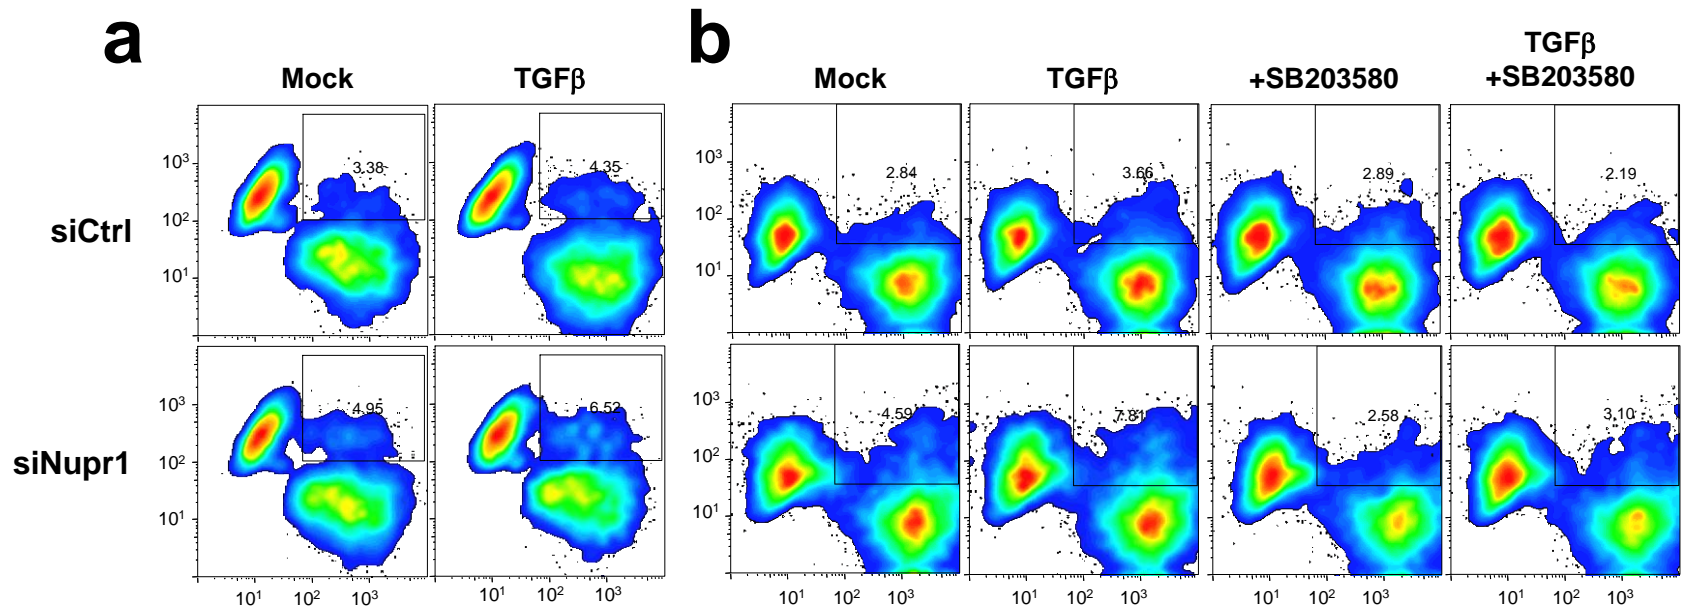

Supplementary Figure 9

*Pdx-1-creER; LSL-KrasG12D; INK4Afl/fl*

*Nupr1* KO

*Nupr1* WT

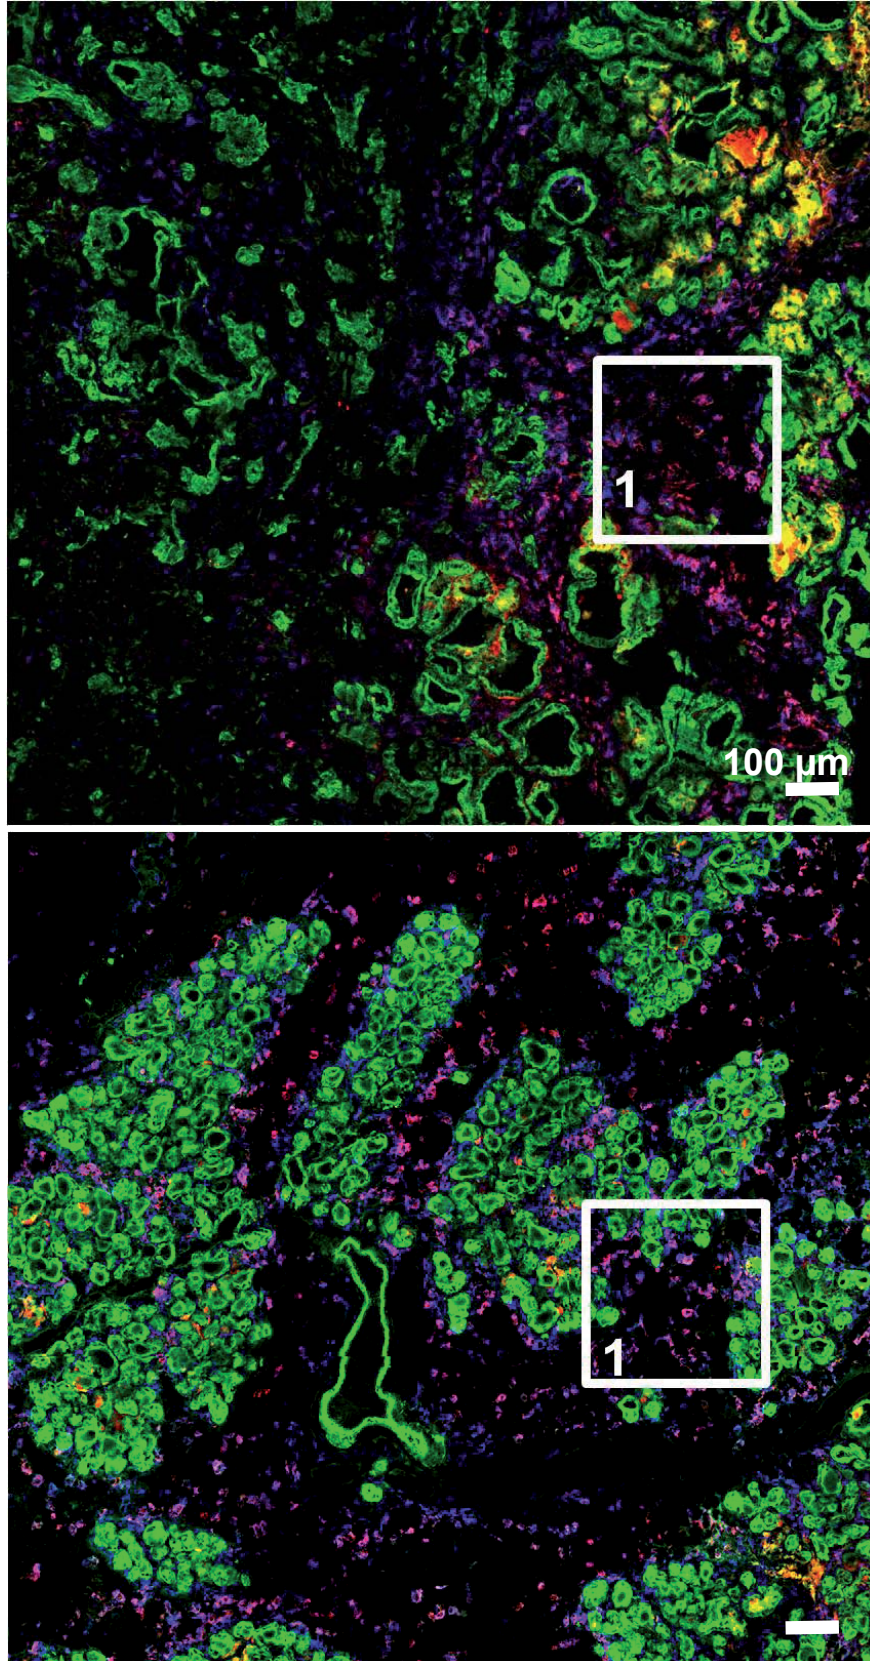

Supplementary Figure 10

**Supplementary Table 1: Clinicopathological Features of Pancreatic Cancer Patients analyzed for Cell Cannibalism**

| PATIENT # | Cell        | AGE | Gender | TNMR      | Metastasis* | Invasion site                    | Chemotherapy                          | Radiotherapy | Post-Operatory | Outcome |
|-----------|-------------|-----|--------|-----------|-------------|----------------------------------|---------------------------------------|--------------|----------------|---------|
|           | Cannibalism |     |        |           |             |                                  |                                       |              | Survival       |         |
| #01       | no          | 67  | M      | T3N1M0R1  | Yes         | peritoneal carcinosis            | Gemcitabine + Folfirinox©             | no           | 109            | dead    |
| #03       | no          | 69  | F      | T3N0M0R0  | no          | N/A                              | Gemcitabine                           | no           | 135            | alive   |
| #12       | no          | 65  | F      | T3N1M1R1  | Yes         | liver                            | Gemcitabine                           | no           | 551            | dead    |
| #21       | no          | 89  | F      | T3N1M0    | Yes         | liver                            | Gemcitabine                           | yes          | 389            | dead    |
| #24       | no          | 74  | F      | T3N1M0R0  | Yes         | peritoneal carcinosis            | Gemcitabine                           | yes          | 349            | dead    |
| #31       | no          | 65  | M      | T3N1M0R0  | no          | N/A                              | Gemcitabine                           | no           | 99             | alive   |
| #36       | no          | 77  | M      | T3N1M0R1  | no          | N/A                              | N/A                                   | no           | 65             | dead    |
| #40       | no          | 56  | M      | T3N1M0R0  | no          | N/A                              | Gemcitabine                           | no           | 350            | alive   |
| #48       | no          | 73  | F      | T2N1M0    | no          | N/A                              | none                                  | no           | 512            | alive   |
| #49       | no          | 71  | M      | T3N1M0R0  | Yes         | liver                            | Gemcitabine                           | no           | 229            | dead    |
| #51       | no          | 55  | M      | T3N0M0    | Yes         | liver                            | none                                  | no           | 667            | dead    |
| #54       | no          | 82  | F      | T3N1M0    | Yes         | peritoneal carcinosis            | none                                  | no           | 493            | dead    |
| #55       | no          | 67  | M      | T1N1M0R0  | Yes         | lung                             | Neoadjuvant Gemcitabine + Gemcitabine | yes          | 119            | dead    |
| #59       | no          | 75  | M      | T3N1M1R0  | Yes         | liver                            | Gemcitabine                           | no           | 503            | dead    |
| #61       | no          | 61  | M      | T3N1M0R0  | no          | N/A                              | Gemcitabine                           | no           | 473            | alive   |
| #63       | no          | 63  | M      | T3N1M0    | Yes         | celiac lymph node and carcinosis | none                                  | no           | 398            | dead    |
| #68       | no          | 67  | M      | T3N1M0R0  | no          | N/A                              | Gemcitabine                           | no           | 475            | alive   |
| #71       | no          | 62  | M      | T3N1M1    | Yes         | peritoneal carcinosis            | N/A                                   | no           | 302            | dead    |
| #87       | no          | 67  | M      | T3N1M0R0  | Yes         | aorta                            | Gemcitabine                           | no           | 607            | alive   |
| #91       | no          | 64  | F      | T3N1bM0R0 | Yes         | liver                            | Gemcitabine                           | no           | 302            | alive   |
| #94       | no          | 65  | M      | T3N0M0R0  | no          | N/A                              | Gemcitabine                           | no           | 61             | alive   |
| #95       | no          | 58  | F      | T3N0M0R1  | no          | N/A                              | Gemcitabine                           | no           | 67             | alive   |
| #98       | no          | 69  | M      | T3N1R1    | Yes         | peritoneal carcinosis            | Gemcitabine                           | no           | 183            | dead    |
| #02       | yes         | 89  | M      | T3N0M0R0  | no          | N/A                              | LV5FU                                 | no           | 402            | alive   |
| #04       | yes         | 71  | F      | T3N0M0R0  | no          | N/A                              | Gemcitabine                           | yes          | 553            | dead    |
| #25       | yes         | 71  | F      | T3N0M0R0  | no          | N/A                              | Gemcitabine                           | no           | 468            | alive   |
| #26       | yes         | 73  | F      | T3N1M0R0  | Yes         | liver                            | LV5FU 2CDDP                           | no           | 78             | alive   |
| #50       | yes         | 60  | F      | T3N0M0R0  | no          | N/A                              | Gemcitabine                           | no           | 473            | alive   |
| #57       | yes         | 69  | M      | T3N1M0    | no          | N/A                              | Gemcitabine                           | no           | 356            | dead    |
| #72       | yes         | 75  | M      | T3N1M0R0  | no          | N/A                              | Gemcitabine                           | no           | 279            | alive   |
| #77       | yes         | 66  | M      | T3N1bM0R0 | Yes         | liver                            | Neoadjuvant Gemcitabine + Folfirinox© | no           | 88             | alive   |
| #80       | yes         | 53  | M      | T4N1M0R0  | no          | N/A                              | N/A                                   | no           | 98             | dead    |
| #87       | yes         | 81  | F      | T3N0M0R0  | no          | N/A                              | Gemcitabine                           | no           | 306            | alive   |

|     |     |    |   |          |    |     |                                         |     |     |       |
|-----|-----|----|---|----------|----|-----|-----------------------------------------|-----|-----|-------|
| #88 | yes | 80 | M | T3N0M0R0 | no | N/A | Gemcitabine                             | no  | 186 | alive |
| #92 | yes | 68 | F | T3N0M0   | no | N/A | LV5FU <sup>2</sup> + 2CDDP <sup>3</sup> | yes | 424 | alive |
| #60 | yes | 86 | H | T3N0M0R0 | no | N/A | Gemcitabine                             | no  | 268 | dead  |

\* TNM Classification (UICC 2009) : T(Tumor) :T1=<2 cm in situ ; T2=>2 cm in situ ; T3= peri-pancreatic tissue invasion without invasion of the celiac axis or the mesenteric artery ; T4= celiac or mesenteric artery invasion. N(Nodal involvement): N0= none, N1= one lymph node involved, N1b =multiple nodal invasion. M(distal metastasis): M0= none, M1= distal metastasis, Mx= insufficient information. R(resection edges):R0= complete resection, R1= incomplete resection with microscopical residues . <sup>2</sup> LV5FU: Calcium Levofolinate + 5-Fluorouracil. <sup>3</sup> 2CDDP: Cisplatin.

## Supplementary Table 2 : Myeloid- and phagocytosis-related genes modulated by Nupr1 in Panc-1 cells upon TGFβ stimulation.

| AFFY_ID     | Symbol   | Name                                                                             | CC_siRNAc_Mock.cel* | CC_siRNAc_TGFb_7H.cel* | CC_siRNAc_TGFb_24H.cel* | CC_siRNANupr1_Mock.cel* | CC_siRNA<br>Nupr1_TGFb_7H.cel* | CC_siRNA<br>Nupr1_TGFb_24H.cel* | P.Value     | Biological Process (GO)                                                                                                                                                                                                                                                                                                                                                                                                                                                                                                                                      |
|-------------|----------|----------------------------------------------------------------------------------|---------------------|------------------------|-------------------------|-------------------------|--------------------------------|---------------------------------|-------------|--------------------------------------------------------------------------------------------------------------------------------------------------------------------------------------------------------------------------------------------------------------------------------------------------------------------------------------------------------------------------------------------------------------------------------------------------------------------------------------------------------------------------------------------------------------|
| 201110_s_at | THBS1    | thrombospondin 1                                                                 | 73                  | 81                     | 114                     | 111                     | 190                            | 181                             | 0.02976828  | 7275 // development // traceable author statement /// 6928 // cell motility // not recorded /// 7155 // cell adhesion // inferred from electronic annotation /// 7596 // blood coagulation // not recorded /// 7399 // neurogenesis // not recorded                                                                                                                                                                                                                                                                                                          |
| 201487_at   | CTSC     | cathepsin C                                                                      | 1575                | 1672                   | 1863                    | 1985                    | 2179                           | 2436                            | 0.042933702 | 6508 // proteolysis and peptidolysis // not recorded /// 6955 // immune response // traceable author statement                                                                                                                                                                                                                                                                                                                                                                                                                                               |
| 209682_at   | CBLB     | Cas-Br-M (murine) ecotropic retroviral transforming sequence b                   | 199                 | 228                    | 267                     | 321                     | 340                            | 402                             | 0.01006776  | 4871 // signal transducer activity // extended: inferred from electronic annotation                                                                                                                                                                                                                                                                                                                                                                                                                                                                          |
| 213012_at   | NEDD4    | neural precursor cell expressed, developmentally down-regulated 4                | 295                 | 399                    | 529                     | 614                     | 659                            | 723                             | 0.022159911 | 6512 // ubiquitin cycle // inferred from electronic annotation                                                                                                                                                                                                                                                                                                                                                                                                                                                                                               |
| 210136_at   | MBP      | myelin basic protein                                                             | 1154                | 1027                   | 1157                    | 2341                    | 2005                           | 1619                            | 0.002845908 | 7268 // synaptic transmission // traceable author statement /// 7417 // central nervous system development // traceable author statement /// 6955 // immune response // traceable author statement                                                                                                                                                                                                                                                                                                                                                           |
| 202541_at   | SCYE1    | small inducible cytokine subfamily E, member 1 (endothelial monocyte-activating) | 412                 | 467                    | 598                     | 834                     | 860                            | 812                             | 0.003429095 | 6954 // inflammatory response // traceable author statement /// 6418 // amino acid activation // traceable author statement /// 6935 // chemotaxis // traceable author statement                                                                                                                                                                                                                                                                                                                                                                             |
| 235255_at   | ATP6V0A2 | ATPase, H+ transporting, lysosomal V0 subunit a2                                 | 64                  | 67                     | 65                      | 142                     | 135                            | 118                             | 0.000219553 | 6955 // immune response // experimental evidence /// 15992 // proton transport                                                                                                                                                                                                                                                                                                                                                                                                                                                                               |
| 217990_at   | GMPR2    | guanosine monophosphate reductase 2                                              | 899                 | 834                    | 900                     | 1441                    | 1470                           | 1345                            | 0.000719249 | 9117 // nucleotide metabolism // inferred from electronic annotation                                                                                                                                                                                                                                                                                                                                                                                                                                                                                         |
| 207594_s_at | SYNJ1    | synaptojanin 1                                                                   | 60                  | 86                     | 81                      | 115                     | 125                            | 108                             | 0.013285462 | 8099 // synaptic vesicle endocytosis // predicted/computed /// 6796 // phosphate metabolism // predicted/computed /// 6899 // nonselective vesicle transport // predicted/computed                                                                                                                                                                                                                                                                                                                                                                           |
| 208979_at   | NCOA6    | nuclear receptor coactivator 6                                                   | 462                 | 400                    | 447                     | 750                     | 710                            | 726                             | 0.000670827 | 6355 // regulation of transcription, DNA-dependent // inferred from electronic annotation /// 7507 // heart development // inferred from sequence or structural similarity /// 7420 // brain development // inferred from sequence or structural similarity /// 6367 // transcription initiation from Pol II promoter // inferred from sequence or structural similarity /// 1701 // embryonic development (sensu Mammalia) // inferred from sequence or structural similarity /// 30099 // myeloid blood cell differentiation // inferred from direct assay |
| 204035_at   | SCG2     | secretogranin II (chromogranin C)                                                | 36                  | 27                     | 42                      | 143                     | 104                            | 103                             | 0.000319735 | 9306 // protein secretion // traceable author statement                                                                                                                                                                                                                                                                                                                                                                                                                                                                                                      |
| 208405_s_at | CD164    | CD164 molecule, sialomucin                                                       | 4230                | 4482                   | 5194                    | 8596                    | 8022                           | 7953                            | 0.000682767 | 6955 // immune response // predicted/computed /// 7165 // signal transduction // predicted/computed /// 7275 // development // predicted/computed /// 7155 // cell adhesion // experimental evidence /// 8285 // negative regulation of cell proliferation // predicted/computed                                                                                                                                                                                                                                                                             |
| 213168_at   | SP3      | Sp3 transcription factor                                                         | 1441                | 1490                   | 1478                    | 1881                    | 1847                           | 1896                            | 0.012824293 | 6355 // regulation of transcription, DNA-dependent // non-traceable author statement                                                                                                                                                                                                                                                                                                                                                                                                                                                                         |

\* Actual RMA normalized data from the array



|             |          |                                                                                |      |      |      |      |      |      |             |                                                                                                                                                                                                                                                                                                                                                                                                                                                                                                                                                                                                                                                                      |
|-------------|----------|--------------------------------------------------------------------------------|------|------|------|------|------|------|-------------|----------------------------------------------------------------------------------------------------------------------------------------------------------------------------------------------------------------------------------------------------------------------------------------------------------------------------------------------------------------------------------------------------------------------------------------------------------------------------------------------------------------------------------------------------------------------------------------------------------------------------------------------------------------------|
| 209481_at   | SNRK     | SNF related kinase                                                             | 284  | 280  | 319  | 374  | 362  | 358  | 0.037401277 | 6468 // protein amino acid phosphorylation // inferred from electronic annotation                                                                                                                                                                                                                                                                                                                                                                                                                                                                                                                                                                                    |
| 203381_s_at | APOE     | apolipoprotein E                                                               | 2657 | 2575 | 2933 | 3573 | 3758 | 3851 | 0.006737008 | 6955 // immune response // not recorded /// 6629 // lipid metabolism // not recorded /// 8015 // circulation // traceable author statement /// 7275 // development // not recorded /// 6869 // lipid transport // inferred from electronic annotation /// 8203 // cholesterol metabolism // traceable author statement                                                                                                                                                                                                                                                                                                                                               |
| 202948_at   | IL1R1    | interleukin 1 receptor, type I                                                 | 231  | 237  | 290  | 390  | 407  | 462  | 0.002340548 | 7166 // cell surface receptor linked signal transduction // traceable author statement /// 6954 // inflammatory response // not recorded /// 6955 // immune response // traceable author statement                                                                                                                                                                                                                                                                                                                                                                                                                                                                   |
| 210232_at   | CDC42    | cell division cycle 42 (GTP binding protein, 25kDa)                            | 44   | 52   | 57   | 164  | 133  | 190  | 0.00015176  | 7015 // actin filament organization // non-traceable author statement /// 7264 // small GTPase mediated signal transduction // inferred from electronic annotation                                                                                                                                                                                                                                                                                                                                                                                                                                                                                                   |
| 203187_at   | DOCK1    | dedicator of cytokinesis 1                                                     | 223  | 241  | 293  | 367  | 430  | 389  | 0.004867063 | 7165 // signal transduction // traceable author statement /// 7229 // integrin-mediated signaling pathway // traceable author statement /// 7264 // small GTPase mediated signal transduction // traceable author statement /// 6915 // apoptosis // traceable author statement /// 6911 // phagocytosis, engulfment // traceable author statement                                                                                                                                                                                                                                                                                                                   |
| 211013_x_at | PML      | promyelocytic leukemia                                                         | 362  | 342  | 330  | 421  | 514  | 503  | 0.011330197 | 7048 // oncogenesis // experimental evidence                                                                                                                                                                                                                                                                                                                                                                                                                                                                                                                                                                                                                         |
| 215116_s_at | DNM1     | dynamain 1                                                                     | 133  | 149  | 139  | 298  | 405  | 404  | 0.0002007   | 6898 // receptor mediated endocytosis // traceable author statement /// 7268 // synaptic transmission // not recorded                                                                                                                                                                                                                                                                                                                                                                                                                                                                                                                                                |
| 210223_s_at | MR1      | major histocompatibility complex, class I-related                              | 150  | 138  | 124  | 198  | 222  | 211  | 0.002607999 | 6955 // immune response // predicted/computed                                                                                                                                                                                                                                                                                                                                                                                                                                                                                                                                                                                                                        |
| 35776_at    | ITSN1    | intersectin 1 (SH3 domain protein)                                             | 323  | 350  | 370  | 455  | 502  | 456  | 0.009513646 | 6897 // endocytosis // inferred from electronic annotation                                                                                                                                                                                                                                                                                                                                                                                                                                                                                                                                                                                                           |
| 224909_s_at | PREX1    | phosphatidylinositol 3,4,5-trisphosphate-dependent RAC exchanger 1             | 283  | 341  | 347  | 570  | 722  | 602  | 0.000802582 | 42119 // neutrophil activation // traceable author statement /// 6801 // superoxide metabolism // traceable author statement /// 7242 // intracellular signaling cascade // inferred from electronic annotation /// 30041 // actin filament polymerization // traceable author statement                                                                                                                                                                                                                                                                                                                                                                             |
| 216627_s_at | B4GALT1  | UDP-Gal:betaGlcNAc beta 1,4- galactosyltransferase, polypeptide 1              | 81   | 109  | 114  | 170  | 301  | 250  | 0.003583858 | ---                                                                                                                                                                                                                                                                                                                                                                                                                                                                                                                                                                                                                                                                  |
| 235287_at   | CDK6     | cyclin-dependent kinase 6                                                      | 105  | 116  | 126  | 188  | 228  | 201  | 0.000900294 | 74 // regulation of cell cycle // traceable author statement /// 80 // G1 phase of mitotic cell cycle // traceable author statement /// 910 // cytokinesis // inferred from electronic annotation /// 6468 // protein amino acid phosphorylation // inferred from electronic annotation                                                                                                                                                                                                                                                                                                                                                                              |
| 223465_at   | COL4A3BP | collagen, type IV, alpha 3 (Goodpasture antigen) binding protein               | 137  | 168  | 183  | 285  | 307  | 237  | 0.004390721 | 6955 // immune response // non-traceable author statement /// 6468 // protein amino acid phosphorylation // traceable author statement                                                                                                                                                                                                                                                                                                                                                                                                                                                                                                                               |
| 226547_at   | MYST3    | MYST histone acetyltransferase (monocytic leukemia) 3                          | 198  | 227  | 259  | 357  | 340  | 315  | 0.007527693 | 6355 // regulation of transcription, DNA-dependent // inferred from electronic annotation /// 6323 // DNA packaging // traceable author statement /// 6334 // nucleosome assembly // inferred from electronic annotation /// 8151 // cell growth and/or maintenance // inferred from electronic annotation                                                                                                                                                                                                                                                                                                                                                           |
| 203507_at   | CD68     | CD68 molecule                                                                  | 127  | 132  | 120  | 137  | 149  | 160  | 0.128801885 | 5624 // membrane fraction // traceable author statement /// 16021 // integral to membrane // traceable author statement /// 16020 // membrane // extended:Unknown; Lamp; 7.5e-182 /// 5764 // lysosome // inferred from electronic annotation                                                                                                                                                                                                                                                                                                                                                                                                                        |
| 206336_at   | CXCL6    | chemokine (C-X-C motif) ligand 6 (granulocyte chemotactic protein 2)           | 15   | 17   | 16   | 20   | 28   | 33   | 0.009567931 | 6954 // inflammatory response // experimental evidence /// 6935 // chemotaxis // experimental evidence /// 7165 // signal transduction // predicted/computed /// 7267 // cell-cell signaling // predicted/computed                                                                                                                                                                                                                                                                                                                                                                                                                                                   |
| 204470_at   | CXCL1    | chemokine (C-X-C motif) ligand 1 (melanoma growth stimulating activity, alpha) | 112  | 149  | 124  | 171  | 255  | 198  | 0.015386183 | 6954 // inflammatory response // traceable author statement /// 7186 // G-protein coupled receptor protein signaling pathway // traceable author statement /// 30036 // actin cytoskeleton organization and biogenesis // traceable author statement /// 6935 // chemotaxis // traceable author statement /// 7401 // pan-neural process // traceable author statement /// 8283 // cell proliferation // traceable author statement /// 6955 // immune response // inferred from electronic annotation /// 7242 // intracellular signaling cascade // traceable author statement /// 8285 // negative regulation of cell proliferation // traceable author statement |
| 205558_at   | TRAF6    | TNF receptor-associated factor 6                                               | 332  | 407  | 333  | 403  | 416  | 408  | 0.234230806 | 7165 // signal transduction // traceable author statement                                                                                                                                                                                                                                                                                                                                                                                                                                                                                                                                                                                                            |
| 210805_x_at | RUNX1    | runt-related transcription factor 1 (acute myeloid leukemia 1; aml1 oncogene)  | 29   | 28   | 33   | 55   | 56   | 61   | 0.000349187 | 6355 // regulation of transcription, DNA-dependent // non-traceable author statement /// 7275 // development // traceable author statement /// 8151 // cell growth and/or maintenance // inferred from electronic annotation                                                                                                                                                                                                                                                                                                                                                                                                                                         |
| 214575_s_at | AZU1     | azurocidin 1 (cationic antimicrobial protein 37)                               | 72   | 70   | 61   | 104  | 111  | 83   | 0.013358766 | 6805 // xenobiotic metabolism // inferred from electronic annotation /// 6935 // chemotaxis // not recorded /// 6508 // proteolysis and peptidolysis // inferred from electronic annotation                                                                                                                                                                                                                                                                                                                                                                                                                                                                          |

|              |        |                                                                     |      |      |      |      |      |      |             |                                                                                                                                                                                                                                                                                                                                                                                                                                                                                        |
|--------------|--------|---------------------------------------------------------------------|------|------|------|------|------|------|-------------|----------------------------------------------------------------------------------------------------------------------------------------------------------------------------------------------------------------------------------------------------------------------------------------------------------------------------------------------------------------------------------------------------------------------------------------------------------------------------------------|
| 207082_at    | CSF1   | colony stimulating factor 1 (macrophage)                            | 151  | 128  | 93   | 250  | 254  | 167  | 0.018536766 | 30225 // macrophage differentiation // traceable author statement /// 8283 // cell proliferation // non-traceable author statement /// 6960 // antimicrobial humoral response (sensu invertebrata) // not recorded /// 8284 // positive regulation of cell proliferation // traceable author statement /// 30097 // hemopoiesis // non-traceable author statement /// 30154 // cell differentiation // non-traceable author statement                                                  |
| 209558_s_at  | HIP1R  | huntingtin interacting protein 1 related                            | 197  | 192  | 175  | 215  | 234  | 215  | 0.114671144 | ---                                                                                                                                                                                                                                                                                                                                                                                                                                                                                    |
| 200991_s_at  | SNX17  | sorting nexin 17                                                    | 3225 | 2808 | 2558 | 3205 | 3225 | 3096 | 0.379041867 | 30100 // regulation of endocytosis // non-traceable author statement /// 6886 // intracellular protein transport // non-traceable author statement /// 16197 // endosome transport // non-traceable author statement /// 45192 // low-density lipoprotein catabolism // non-traceable author statement /// 7242 // intracellular signaling cascade // inferred from electronic annotation /// 7218 // neuropeptide signaling pathway // inferred from electronic annotation            |
| 232331_at    | PPARG  | peroxisome proliferator-activated receptor gamma                    | 220  | 239  | 213  | 135  | 138  | 116  | 0.000794543 | ---                                                                                                                                                                                                                                                                                                                                                                                                                                                                                    |
| 205731_s_at  | NCOA2  | nuclear receptor coactivator 2                                      | 133  | 149  | 147  | 178  | 167  | 165  | 0.080708343 | 6355 // regulation of transcription, DNA-dependent // non-traceable author statement /// 7165 // signal transduction // inferred from electronic annotation                                                                                                                                                                                                                                                                                                                            |
| 203085_s_at  | TGFB1  | <b>transforming growth factor, beta 1</b>                           | 416  | 557  | 565  | 541  | 933  | 1046 | 0.083198485 | 8283 // cell proliferation // inferred from electronic annotation /// 6916 // anti-apoptosis // traceable author statement /// 7267 // cell-cell signaling // not recorded /// 16049 // cell growth // inferred from electronic annotation /// 7179 // TGFbeta receptor signaling pathway // not recorded /// 74 // regulation of cell cycle // inferred from electronic annotation /// 40007 // growth // inferred from electronic annotation                                         |
| 206924_at    | IL11   | interleukin 11                                                      | 88   | 141  | 190  | 105  | 282  | 464  | 0.298975642 | 7267 // cell-cell signaling // Unknown /// 8284 // positive regulation of cell proliferation // inferred from direct assay /// 45444 // adipocyte differentiation // non-traceable author statement /// 8283 // cell proliferation // traceable author statement /// 30219 // megakaryocyte differentiation // non-traceable author statement /// 30183 // B-cell differentiation // non-traceable author statement /// 30168 // platelet activation // non-traceable author statement |
| 209083_at    | CORO1A | coronin, actin binding protein, 1A                                  | 144  | 142  | 138  | 130  | 216  | 168  | 0.387528279 | 6912 // phagosome formation // not recorded /// 7067 // mitosis // not recorded /// 6928 // cell motility // not recorded /// 6810 // transport // not recorded                                                                                                                                                                                                                                                                                                                        |
| 239796_x_at  | TIRAP  | toll-interleukin 1 receptor (TIR) domain containing adaptor protein | 153  | 138  | 150  | 125  | 122  | 100  | 0.054755122 | ---                                                                                                                                                                                                                                                                                                                                                                                                                                                                                    |
| 202430_s_at  | PLSCR1 | phospholipid scramblase 1                                           | 153  | 124  | 153  | 124  | 105  | 105  | 0.061787005 | 30168 // platelet activation // non-traceable author statement /// 17121 // phospholipid scrambling // traceable author statement                                                                                                                                                                                                                                                                                                                                                      |
| 204039_at    | CEBPA  | CCAAT/enhancer binding protein (C/EBP), alpha                       | 108  | 107  | 79   | 69   | 60   | 67   | 0.015704743 | ---                                                                                                                                                                                                                                                                                                                                                                                                                                                                                    |
| 1552256_a_at | SCARB1 | scavenger receptor class B, member 1                                | 2037 | 2263 | 1954 | 1572 | 1830 | 1385 | 0.047767136 | 7155 // cell adhesion // extended:inferred from sequence similarity; CD36; 2e-239                                                                                                                                                                                                                                                                                                                                                                                                      |
| 200901_s_at  | M6PR   | mannose-6-phosphate receptor (cation dependent)                     | 1459 | 1454 | 1510 | 534  | 797  | 708  | 0.000701576 | 6898 // receptor mediated endocytosis // traceable author statement /// 8333 // endosome to lysosome transport // traceable author statement /// 6810 // transport // inferred from electronic annotation                                                                                                                                                                                                                                                                              |
| 213373_s_at  | CASP8  | caspase 8, apoptosis-related cysteine peptidase                     | 934  | 916  | 942  | 635  | 770  | 712  | 0.01641571  | 6508 // proteolysis and peptidolysis // traceable author statement /// 8632 // apoptotic program // traceable author statement                                                                                                                                                                                                                                                                                                                                                         |
| 206788_s_at  | CBFB   | core-binding factor, beta subunit                                   | 983  | 1768 | 1757 | 784  | 1256 | 1018 | 0.183335483 | 6366 // transcription from Poi II promoter // predicted/computed /// 7048 // oncogenesis // predicted/computed                                                                                                                                                                                                                                                                                                                                                                         |

**Supplementary Table 3 : GO-ANOVA Analysis.**

| GO ID | GO Description                                  | p-value(Nupr1status) | p-value(siCtrl vs. siNupr1) | Ratio(siCtrl vs. siNupr1) | Fold-Change(siCtrl vs. siNupr1) | Fold-Change(siCtrl vs. siNupr1) (Description) | F(Nupr1status) | F(Marker ID) | F(Sample ID(Nupr1status)) | SS(Error) | F(Error) |
|-------|-------------------------------------------------|----------------------|-----------------------------|---------------------------|---------------------------------|-----------------------------------------------|----------------|--------------|---------------------------|-----------|----------|
| 2761  | regulation of myeloid leukocyte differentiation | 0,000629138          | 0,000629138                 | 0,91978                   | -1,08722                        | siCtrl down vs siNupr1                        | 94,3322        | 312,866      | 0,268062                  | 28,6713   | 1        |
| 2274  | myeloid leukocyte activation                    | 0,00214641           | 0,00214641                  | 0,893518                  | -1,11917                        | siCtrl down vs siNupr1                        | 49,554         | 480,566      | 0,389795                  | 8,31837   | 1        |
| 30099 | myeloid cell differentiation                    | 0,0114085            | 0,0114085                   | 0,937862                  | -1,06626                        | siCtrl down vs siNupr1                        | 19,6384        | 536,121      | 0,553749                  | 26,1242   | 1        |
| 2573  | myeloid leukocyte differentiation               | 0,012251             | 0,012251                    | 0,861783                  | -1,16039                        | siCtrl down vs siNupr1                        | 18,8373        | 503,481      | 1,05311                   | 10,4471   | 1        |
| 2444  | myeloid leukocyte mediated immunity             | 0,0123983            | 0,0123983                   | 0,826785                  | -1,2095                         | siCtrl down vs siNupr1                        | 18,7057        | 695,459      | 1,22014                   | 1,78168   | 1        |

| Gene Symbol | Gene Title                                                                       | RefSeq Transcript ID                                                                               | p-value (Nupr1status) | p-value (siCtrl vs. siNupr1) | qvalue(p-value (siCtrl vs. siNupr1)) | qvalue(p-value (siCtrl vs. siNupr1)) | Ratio (siCtrl vs. siNupr1) | Fold-Change (siCtrl vs. siNupr1) | Fold-Change (siCtrl vs. siNupr1) (Description) | F(Nupr1status) | SS(Nupr1status) | SS(Error) | F(Error) |
|-------------|----------------------------------------------------------------------------------|----------------------------------------------------------------------------------------------------|-----------------------|------------------------------|--------------------------------------|--------------------------------------|----------------------------|----------------------------------|------------------------------------------------|----------------|-----------------|-----------|----------|
| PPARA       | peroxisome proliferator-activated receptor alpha                                 | NM_001001928<br>/// NM_005036<br>NM_001001890                                                      | 0,000375756           | 0,00037576                   | 0,0170633                            | 0,0170598                            | 0,427624                   | -2,3385                          | siCtrl down vs siNupr1                         | 123,037        | 2,25308         | 0,07325   | 1        |
| RUNX1       | runt-related transcription factor 1                                              | ///<br>NM_001122607<br>/// NM_001754<br>NM_001130101                                               | 0,000476419           | 0,00047642                   | 0,0182843                            | 0,0182805                            | 0,5282                     | -1,89322                         | siCtrl down vs siNupr1                         | 108,897        | 1,27193         | 0,04672   | 1        |
| NR1H3       | nuclear receptor subfamily 1, group H, member 3                                  | ///<br>NM_001130102<br>/// NM_005693                                                               | 0,000516804           | 0,0005168                    | 0,0187915                            | 0,0187876                            | 0,659966                   | -1,51523                         | siCtrl down vs siNupr1                         | 104,423        | 0,539165        | 0,02065   | 1        |
| ABCA1       | ATP-binding cassette, sub-family A (ABC1), member 1                              | NM_005502                                                                                          | 0,000653146           | 0,00065315                   | 0,0199516                            | 0,0199475                            | 0,490289                   | -2,03961                         | siCtrl down vs siNupr1                         | 92,5207        | 1,58609         | 0,06857   | 1        |
| NFKBIA      | nuclear factor of kappa light polypeptide gene enhancer in B-cells inhibitor, al | NM_020529                                                                                          | 0,00147496            | 0,00147496                   | 0,0261202                            | 0,0261149                            | 2,09383                    | 2,09383                          | siCtrl up vs siNupr1                           | 60,4602        | 1,705           | 0,1128    | 1        |
| ACIN1       | apoptotic chromatin condensation inducer 1                                       | NM_001164814<br>///<br>NM_001164815<br>///<br>NM_001164816<br>///<br>NM_001164817<br>/// NM_014977 | 0,00246383            | 0,00246383                   | 0,031182                             | 0,0311756                            | 0,73843                    | -1,35422                         | siCtrl down vs siNupr1                         | 46,0322        | 0,287066        | 0,02494   | 1        |
| ZNF675      | zinc finger protein 675                                                          | NM_138330                                                                                          | 0,00266852            | 0,00266852                   | 0,0322383                            | 0,0322316                            | 0,563618                   | -1,77425                         | siCtrl down vs siNupr1                         | 44,1025        | 1,02642         | 0,09309   | 1        |
| CALCA       | calcitonin-related polypeptide alpha                                             | NM_001033952<br>///<br>NM_001033953<br>/// NM_001741<br>NM_000685<br>///<br>NM_004835<br>///       | 0,0103372             | 0,0103372                    | 0,0601059                            | 0,0600934                            | 0,942847                   | -1,06062                         | siCtrl down vs siNupr1                         | 20,7955        | 0,0108133       | 0,00208   | 1        |
| AGTR1       | angiotensin II receptor, type 1                                                  | NM_009585<br>///<br>NM_031850<br>///<br>NM_032049                                                  | 0,0129559             | 0,0129559                    | 0,0670306                            | 0,0670167                            | 0,807384                   | -1,23857                         | siCtrl down vs siNupr1                         | 18,2281        | 0,142918        | 0,03136   | 1        |

### Supplementary Table 3 : GO-ANOVA Analysis.

|                      |                                                                            |                                                                       |           |           |           |           |          |          |                        |         |                |         |   |
|----------------------|----------------------------------------------------------------------------|-----------------------------------------------------------------------|-----------|-----------|-----------|-----------|----------|----------|------------------------|---------|----------------|---------|---|
| NFKB1                | nuclear factor of kappa light polypeptide gene enhancer in B-cells 1       | NM_001165412<br>/// NM_003998                                         | 0,0130523 | 0,0130523 | 0,0672521 | 0,0672385 | 1,36778  | 1,36778  | siCtrl up vs siNupr1   | 18,1487 | 0,30623<br>7   | 0,0675  | 1 |
| CARTPT               | CART prepropeptide                                                         | NM_004291                                                             | 0,0137527 | 0,0137527 | 0,0688073 | 0,0687932 | 1,05732  | 1,05732  | siCtrl up vs siNupr1   | 17,5968 | 0,00969<br>961 | 0,0022  | 1 |
| ADIPOQ               | adiponectin, C1Q and collagen domain containing                            | NM_001177800<br>/// NM_004797                                         | 0,0228922 | 0,0228922 | 0,0887802 | 0,0887619 | 1,30083  | 1,30083  | siCtrl up vs siNupr1   | 12,9126 | 0,21595<br>6   | 0,0669  | 1 |
| PLA2G10              | phospholipase A2, group X                                                  | NM_003561                                                             | 0,0256958 | 0,0256958 | 0,0939976 | 0,0939782 | 1,18972  | 1,18972  | siCtrl up vs siNupr1   | 12,0076 | 0,09421<br>57  | 0,03139 | 1 |
| ITGB3                | integrin, beta 3 (platelet glycoprotein IIIa, antigen CD61)                | NM_000212                                                             | 0,0285736 | 0,0285736 | 0,0992617 | 0,0992415 | 0,658642 | -1,51828 | siCtrl down vs siNupr1 | 11,2213 | 0,54438<br>9   | 0,19406 | 1 |
| BGLAP<br>///<br>PMF1 | bone gamma-carboxyglutamate (gla) protein /// polyamine-modulated factor 1 | NM_199173                                                             | 0,0315904 | 0,0315904 | 0,104839  | 0,104818  | 0,817965 | -1,22255 | siCtrl down vs siNupr1 | 10,5157 | 0,12605<br>3   | 0,04795 | 1 |
| NR1H2                | nuclear receptor subfamily 1, group H, member 2                            | NM_007121                                                             | 0,0325552 | 0,0325552 | 0,10623   | 0,106208  | 0,767208 | -1,30343 | siCtrl down vs siNupr1 | 10,3111 | 0,21924<br>2   | 0,08505 | 1 |
| CSF1                 | colony stimulating factor 1 (macrophage)                                   | NM_000757<br>///<br>NM_172210<br>///<br>NM_172211<br>///<br>NM_172212 | 0,0397001 | 0,0397001 | 0,118767  | 0,118742  | 0,551724 | -1,8125  | siCtrl down vs siNupr1 | 9,03702 | 1,1042         | 0,48874 | 1 |

**Supplementary Table 4: EMT- related genes modulated by Nupr1 in Panc-1 cells upon TGF $\beta$  stimulation.**

| Affy ID     | Symbol | Name                                                                                                                                                                                         | P.Value    | CC_siRNAc_Mock.cel | CC_siRNAc_TGFb_7H.cel | CC_siRNAc_TGFb_24H.cel | CC_siRNA Nupr1_Mock.cel | CC_siRNA Nupr1_TGFb_7H.cel | CC_siRNA Nupr1_TGFb_24H.cel | Biological Process (GO)                                                                                                                                                                                                                                                                                                     |
|-------------|--------|----------------------------------------------------------------------------------------------------------------------------------------------------------------------------------------------|------------|--------------------|-----------------------|------------------------|-------------------------|----------------------------|-----------------------------|-----------------------------------------------------------------------------------------------------------------------------------------------------------------------------------------------------------------------------------------------------------------------------------------------------------------------------|
| 243140_at   | ACTA2  | actin, alpha 2, smooth muscle, aorta                                                                                                                                                         | 0.28090717 | 16                 | 16                    | 14                     | 14                      | 13                         | 14                          | 7517 // muscle development // non-traceable author statement                                                                                                                                                                                                                                                                |
| 203324_s_at | CAV2   | caveolin 2                                                                                                                                                                                   | 0.00881085 | 3828               | 3878                  | 4208                   | 5454                    | 5240                       | 5125                        | ---                                                                                                                                                                                                                                                                                                                         |
| 201131_s_at | CDH1   | cadherin 1, type 1, E-cadherin (epithelial)                                                                                                                                                  | 0.50898017 | 701                | 644                   | 329                    | 467                     | 553                        | 246                         | ---                                                                                                                                                                                                                                                                                                                         |
| 203440_at   | CDH2   | cadherin 2, type 1, N-cadherin (neuronal)                                                                                                                                                    | 0.09755644 | 106                | 109                   | 93                     | 83                      | 80                         | 92                          | 7156 // homophilic cell adhesion // inferred from electronic annotation /// 7155 // cell adhesion // traceable author statement                                                                                                                                                                                             |
| 218182_s_at | CLDN1  | claudin 1                                                                                                                                                                                    | 0.0655784  | 205                | 194                   | 192                    | 371                     | 346                        | 207                         | 7155 // cell adhesion // traceable author statement                                                                                                                                                                                                                                                                         |
| 203954_x_at | CLDN3  | claudin 3                                                                                                                                                                                    | 0.42939301 | 285                | 199                   | 181                    | 216                     | 185                        | 150                         | ---                                                                                                                                                                                                                                                                                                                         |
| 202790_at   | CLDN7  | claudin 7                                                                                                                                                                                    | 0.00326471 | 701                | 551                   | 592                    | 1119                    | 1056                       | 891                         | ---                                                                                                                                                                                                                                                                                                                         |
| 1554411_at  | CTNNB1 | catenin (cadherin-associated protein), beta 1, 88kDa                                                                                                                                         | 0.02153537 | 75                 | 73                    | 81                     | 62                      | 59                         | 61                          | 6350 // transcription // inferred from electronic annotation /// 7155 // cell adhesion // inferred from electronic annotation /// 6357 // regulation of transcription from Pol II promoter // not recorded                                                                                                                  |
| 227561_at   | DDR2   | discoidin domain receptor tyrosine kinase 2                                                                                                                                                  | 0.00060277 | 116                | 160                   | 121                    | 284                     | 262                        | 291                         | 7165 // signal transduction // traceable author statement /// 7155 // cell adhesion // traceable author statement /// 7169 // transmembrane receptor protein tyrosine kinase signaling pathway // inferred from electronic annotation /// 6468 // protein amino acid phosphorylation // inferred from electronic annotation |
| 218995_s_at | EDN1   | endothelin 1                                                                                                                                                                                 | 0.01883358 | 795                | 1134                  | 949                    | 554                     | 727                        | 589                         | 8217 // regulation of blood pressure // not recorded /// 7165 // signal transduction // traceable author statement /// 7267 // cell-cell signaling // not recorded /// 8284 // positive regulation of cell proliferation // traceable author statement /// 9405 // pathogenesis // inferred from electronic annotation      |
| 208229_at   | FGFR2  | fibroblast growth factor receptor 2 (bacteria-expressed kinase, keratinocyte growth factor receptor, craniofacial dysostosis 1, Crouzon syndrome, Pfeiffer syndrome, Jackson-Weiss syndrome) | 0.14159658 | 103                | 103                   | 80                     | 72                      | 88                         | 69                          | ---                                                                                                                                                                                                                                                                                                                         |
| 203689_s_at | FMR1   | fragile X mental retardation 1                                                                                                                                                               | 0.14555935 | 1217               | 1338                  | 1415                   | 1107                    | 1195                       | 1099                        | ---                                                                                                                                                                                                                                                                                                                         |
| 214520_at   | FOXC2  | forkhead box C2 (MFH-1, mesenchyme forkhead 1)                                                                                                                                               | 0.28417847 | 86                 | 68                    | 65                     | 57                      | 67                         | 64                          | 6355 // regulation of transcription, DNA-dependent // inferred from electronic annotation /// 7498 // mesoderm development // traceable author statement /// 6366 // transcription from Pol II promoter // traceable author statement                                                                                       |
| 202351_at   | ITGAV  | integrin, alpha V (vitronectin receptor, alpha polypeptide, antigen CD51)                                                                                                                    | 0.2303204  | 4002               | 5000                  | 5928                   | 2927                    | 3834                       | 4753                        | 7160 // cell-matrix adhesion // inferred from electronic annotation /// 7229 // integrin-mediated signaling pathway // inferred from electronic annotation                                                                                                                                                                  |
| 228491_at   | KRT19  | keratin 19                                                                                                                                                                                   | 0.3559775  | 19909              | 17659                 | 16383                  | 19805                   | 19014                      | 16576                       | ---                                                                                                                                                                                                                                                                                                                         |
| 221558_s_at | LEF1   | lymphoid enhancer-binding factor 1                                                                                                                                                           | 0.00037419 | 204                | 202                   | 189                    | 112                     | 110                        | 94                          | 6355 // regulation of transcription, DNA-dependent // inferred from electronic annotation                                                                                                                                                                                                                                   |
| 207233_s_at | MITF   | microphthalmia-associated transcription factor                                                                                                                                               | 0.0526219  | 387                | 344                   | 408                    | 536                     | 484                        | 435                         | ---                                                                                                                                                                                                                                                                                                                         |
| 1566678_at  | MMP2   | matrix metalloproteinase 2 (gelatinase A, 72kDa gelatinase, 72kDa type IV collagenase)                                                                                                       | 0.23796425 | 57                 | 60                    | 55                     | 49                      | 52                         | 51                          | 30574 // collagen catabolism // inferred from electronic annotation                                                                                                                                                                                                                                                         |

|              |          |                                                                                               |            |       |       |       |       |       |       |                                                                                                                                                                                                                                                                                       |
|--------------|----------|-----------------------------------------------------------------------------------------------|------------|-------|-------|-------|-------|-------|-------|---------------------------------------------------------------------------------------------------------------------------------------------------------------------------------------------------------------------------------------------------------------------------------------|
| 207847_s_at  | MUC1     | mucin 1, cell surface associated                                                              | 0.03422693 | 101   | 105   | 86    | 148   | 153   | 112   | ---                                                                                                                                                                                                                                                                                   |
| 209925_at    | OCLN     | occludin                                                                                      | 0.70430591 | 1568  | 1456  | 1269  | 2070  | 1429  | 1280  | 6461 // protein complex assembly // traceable author statement                                                                                                                                                                                                                        |
| 203186_s_at  | S100A4   | S100 calcium binding protein A4                                                               | 0.46173294 | 12309 | 12408 | 12283 | 11815 | 11575 | 11034 | 7125 // invasive growth // not recorded                                                                                                                                                                                                                                               |
| 1568765_at   | SERPINE1 | serpin peptidase inhibitor, clade E (nexin, plasminogen activator inhibitor type 1), member 1 | 0.56620425 | 114   | 268   | 258   | 87    | 200   | 193   | 7596 // blood coagulation // traceable author statement                                                                                                                                                                                                                               |
| 211114_x_at  | SIP1     | survival of motor neuron protein interacting protein 1                                        | 0.01648116 | 292   | 309   | 324   | 452   | 407   | 377   | 245 // spliceosome assembly // experimental evidence /// 6397 // mRNA processing // experimental evidence                                                                                                                                                                             |
| 1556154_a_at | SNAI3    | snail homolog 3 (Drosophila)                                                                  | 0.06529162 | 38    | 38    | 35    | 48    | 42    | 46    | ---                                                                                                                                                                                                                                                                                   |
| 202935_s_at  | SOX9     | SRY (sex determining region Y)-box 9 (campomelic dysplasia, autosomal sex-reversal)           | 0.01201282 | 3012  | 2873  | 2979  | 2230  | 2248  | 2386  | 1502 // cartilage condensation // not recorded /// 6357 // regulation of transcription from Pol II promoter // traceable author statement                                                                                                                                             |
| 225289_at    | STAT3    | signal transducer and activator of transcription 3 (acute-phase response factor)              | 0.01747467 | 773   | 649   | 671   | 992   | 941   | 869   | ---                                                                                                                                                                                                                                                                                   |
| 240188_at    | TGFBR3   | transforming growth factor, beta receptor III                                                 | 0.15544694 | 61    | 65    | 63    | 59    | 51    | 52    | ---                                                                                                                                                                                                                                                                                   |
| 229404_at    | TWIST2   | twist homolog 2 (Drosophila)                                                                  | 0.1491382  | 298   | 229   | 240   | 230   | 183   | 206   | 45668 // negative regulation of osteoblast differentiation // inferred from direct assay /// 30154 // cell differentiation // inferred from electronic annotation /// 45892 // negative regulation of transcription, DNA-dependent // inferred from sequence or structural similarity |
| 223642_at    | ZIC2     | Zic family member 2 (odd-paired homolog, Drosophila)                                          | 0.04528176 | 1118  | 857   | 898   | 821   | 600   | 625   | 7420 // brain development // traceable author statement                                                                                                                                                                                                                               |
